# Supplementary material
Source: publisher figshare collection journal article supplement (https://diabetesjournals.figshare.com/ndownloader/files/24740828)
Supplement: Supplementary file 1 [file 24740828]

# Supplemental Figure 1

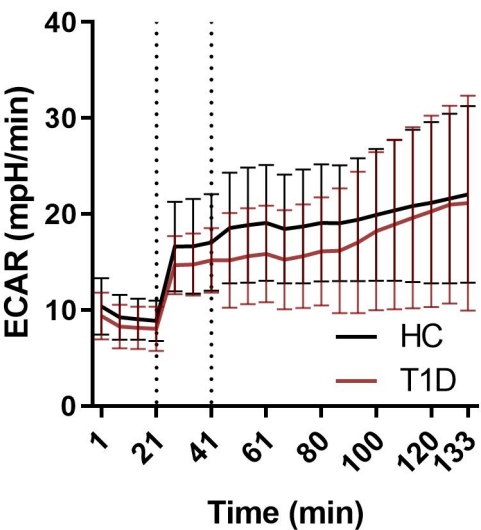

**Supplemental Figure 1.** The extracellular acidification rate of CD14+ monocytes isolated from T1D patients and HCs was measured basally, after injection of glucose (first dotted line) and after injection of LPS (second dotted line). T1D: type 1 diabetes, HC: healthy controls, ECAR: extracellular acidification rate, LPS: lipopolysaccharide.

# Supplemental Figure 2

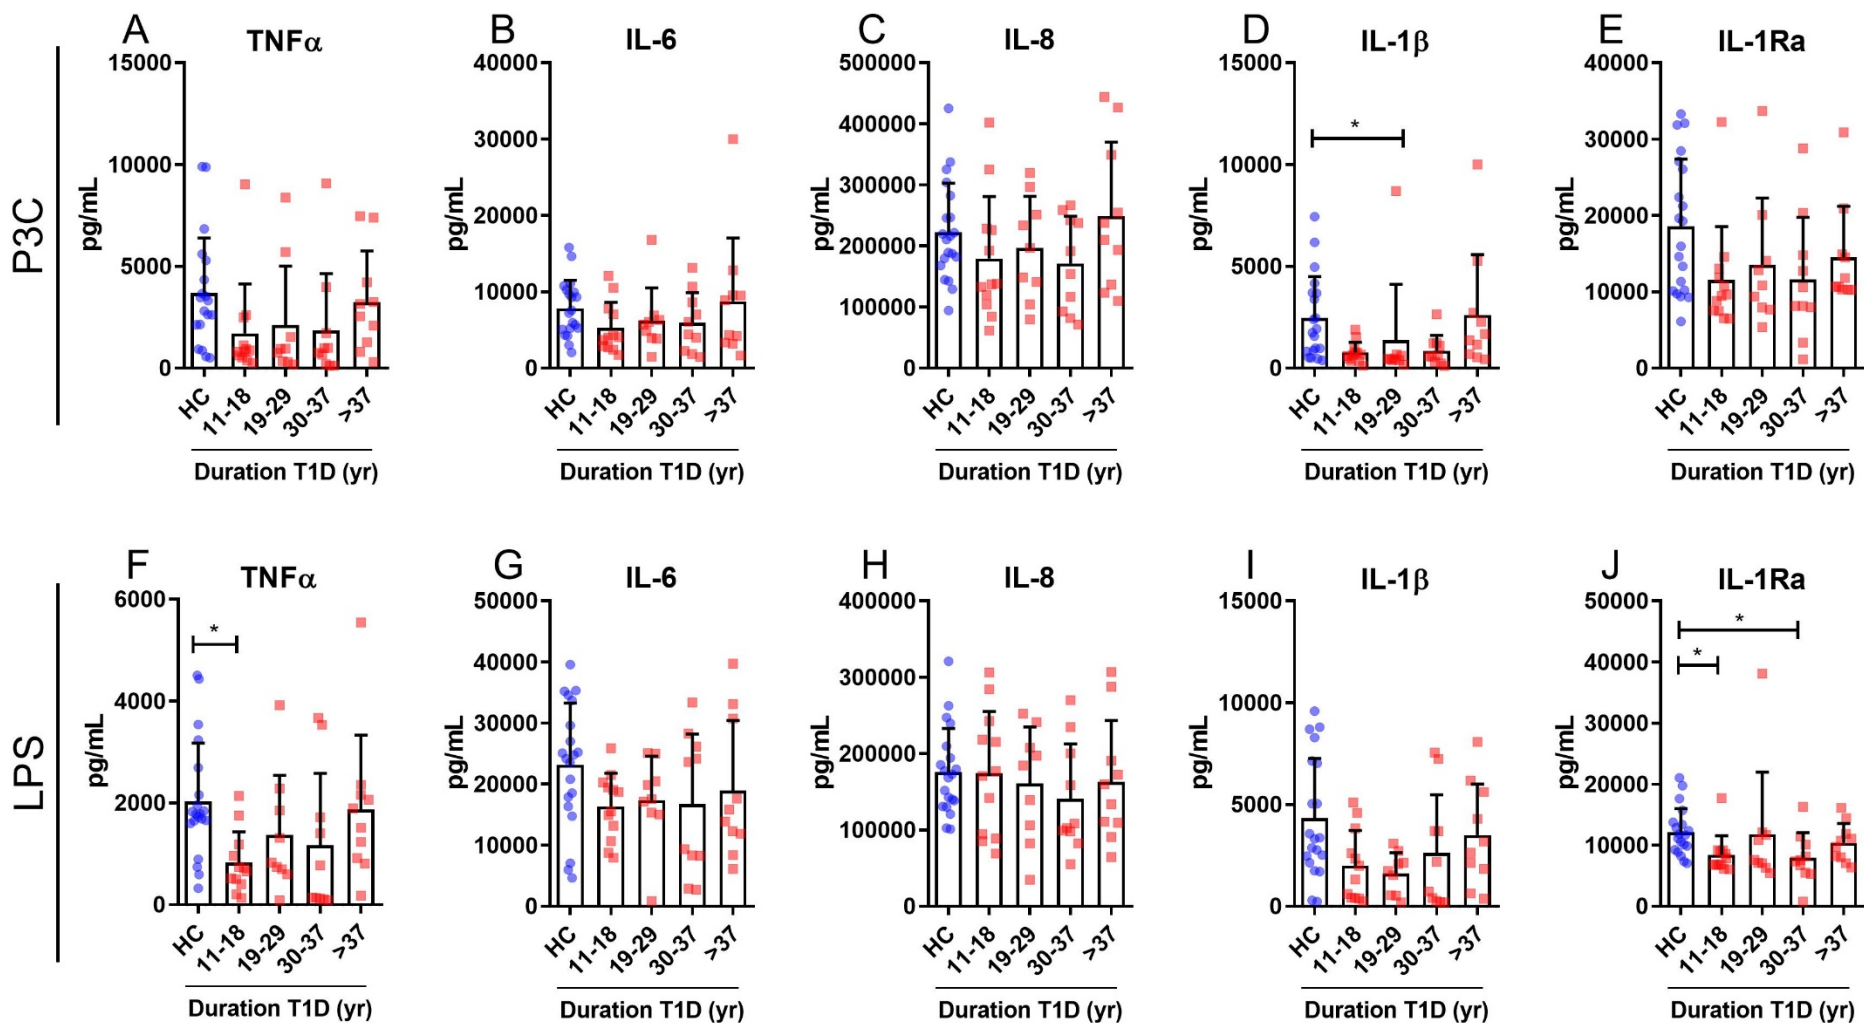

**Supplemental Figure 2.** CD14+ monocytes were stimulated with P3C or LPS and TNF $\alpha$  (A and F,  $p = 0.0373$ ), IL-6 (B and G), IL-8 (C and H), IL-1 $\beta$  (D,  $p = 0.0324$  and I) and IL-1Ra (E and J,  $p = 0.0185$  and  $p = 0.0354$ ) were measured. Quartiles of equal size were created for T1D patients based on duration of diabetes. Duration quartiles: HC:  $n = 20$ ; T1D quartiles:  $n = 10-12$ ; \* $p < 0.05$ , T1D: type 1 diabetes, HC: healthy controls, P3C: Pam3CysK, LPS: lipopolysaccharide.

# Supplemental Figure 3

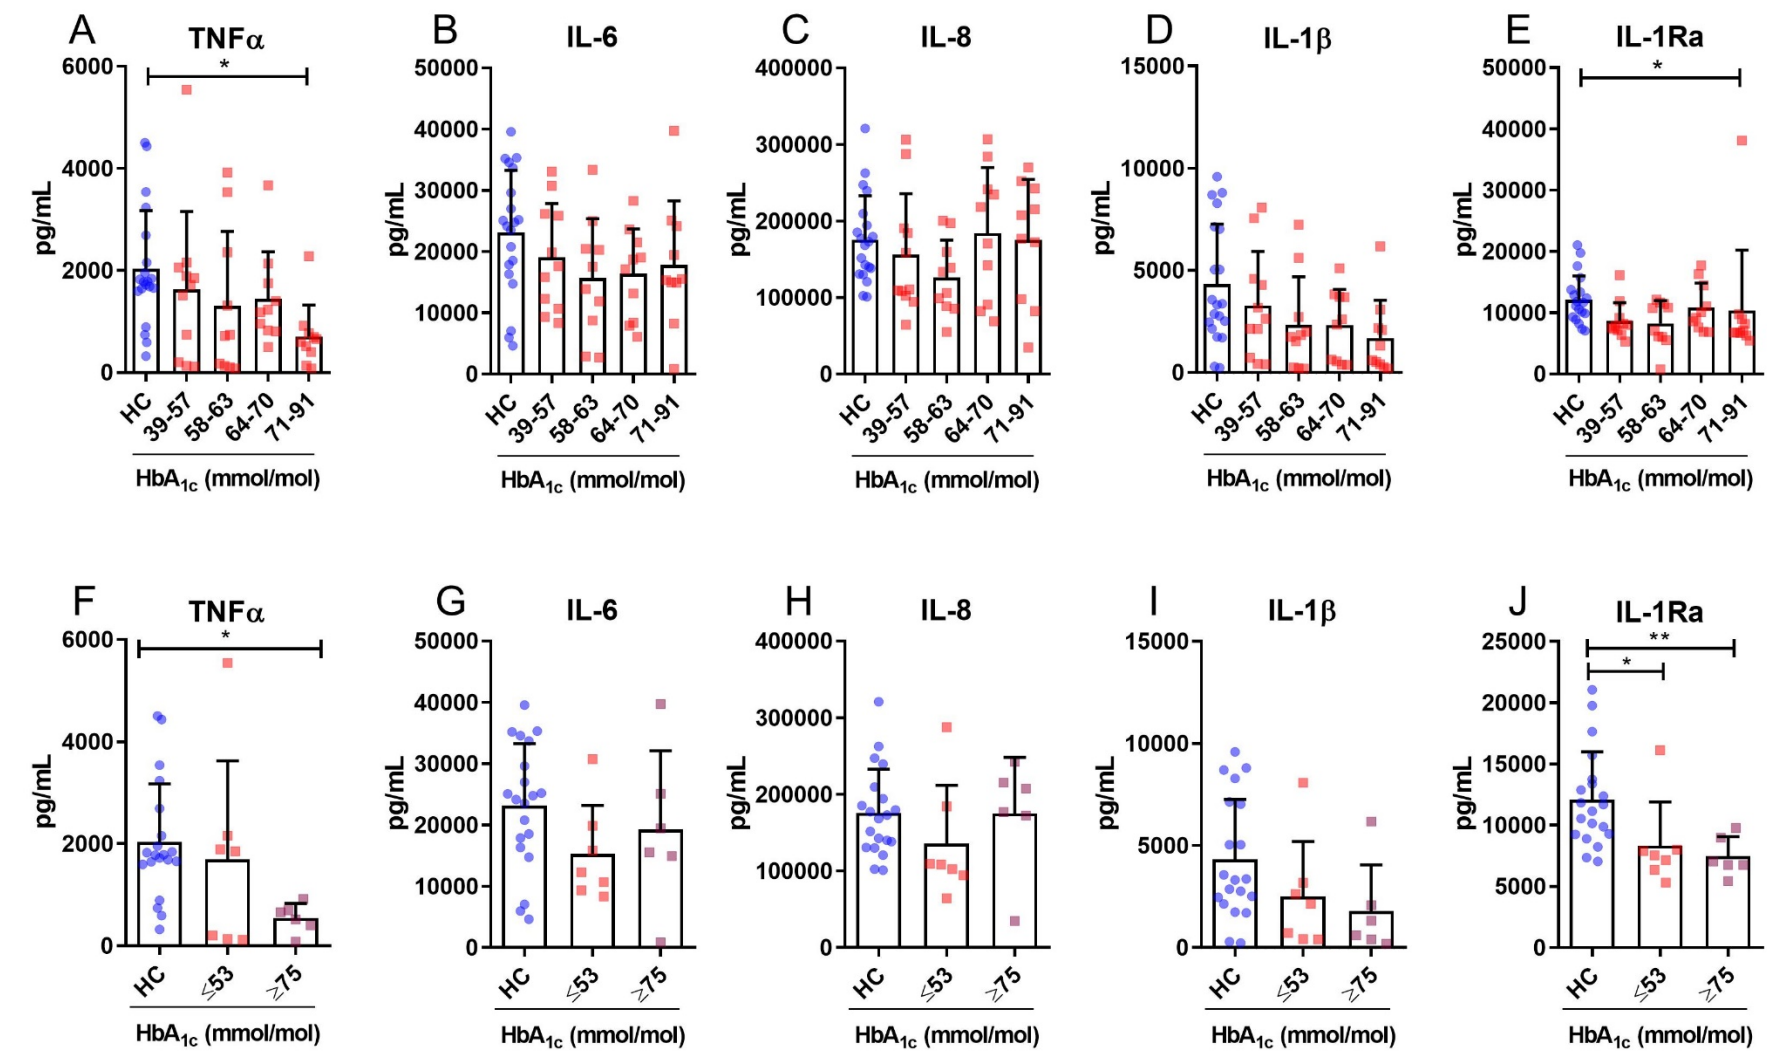

**Supplemental Figure 3.** CD14+ monocytes were stimulated with LPS, after which TNF $\alpha$ , IL-6, IL-8, IL-1 $\beta$  and IL-1Ra were measured. Quartiles of equal size were created for T1D patients based on HbA<sub>1c</sub> levels (A,  $p = 0.0179$ ; B; C; D; E,  $p = 0.0220$ ), and two groups with clinically relevant HbA<sub>1c</sub> levels ( $\leq 53$  and  $\geq 75$  mmol/mol) were compared against healthy controls (F,  $p = 0.0184$ ; G; H; I; J,  $p = 0.0276$  and  $p = 0.0090$ ). HbA<sub>1c</sub> quartiles HC:  $n = 20$ ; T1D quartiles:  $n = 10-11$ ; HbA<sub>1c</sub>  $\leq 53$  mmol/mol:  $n = 7$ , HbA<sub>1c</sub>  $\geq 75$ :  $n = 6$ . \* $p < 0.05$ , \*\* $p < 0.01$ . T1D: type 1 diabetes, HC: healthy controls, LPS: lipopolysaccharide.

# Supplemental Figure 4

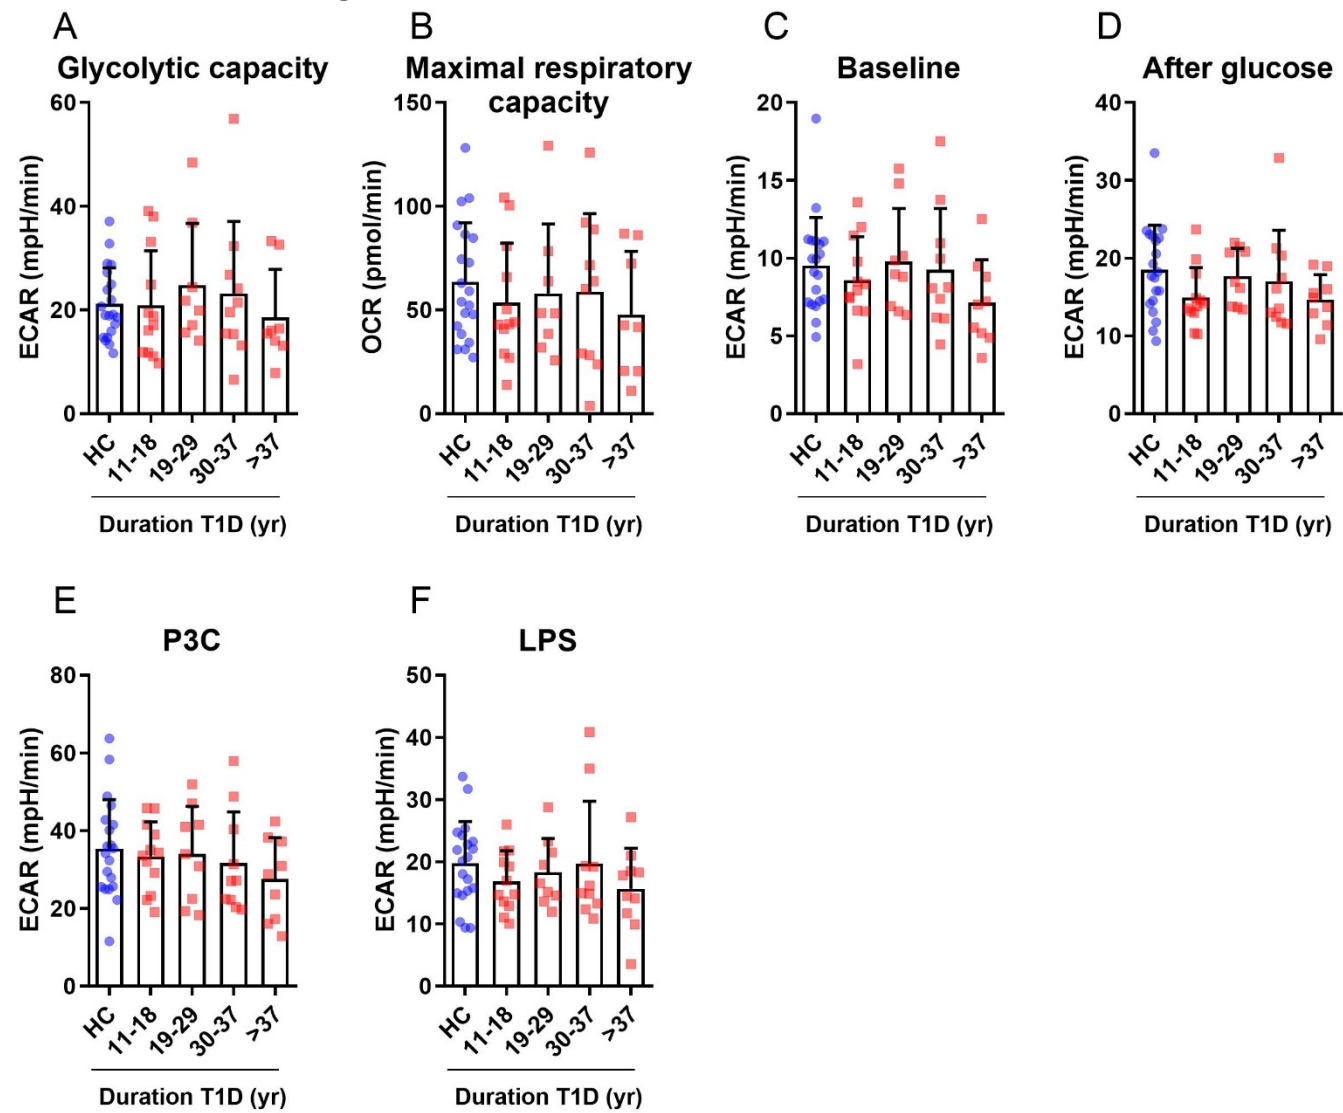

**Supplemental Figure 4.** Extracellular Flux of monocytes isolated from T1D patients and HCs was measured. Values of T1D patients are shown grouped into equally sized quartiles based on duration of diabetes and compared with values of HCs on glycolytic capacity (A), maximal respiratory capacity (B), ECAR at baseline (C), ECAR after glucose injection (D), ECAR after P3C stimulation (E) or ECAR after LPS stimulation (F). Quartiles; HC: n = 20, T1D quartiles: n = 10-11, T1D: type 1 diabetes, HC: healthy controls, ECAR: extracellular acidification rate, OCR: oxygen consumption rate; P3C: Pam3CysK, LPS: lipopolysaccharide.

# Supplemental Figure 5

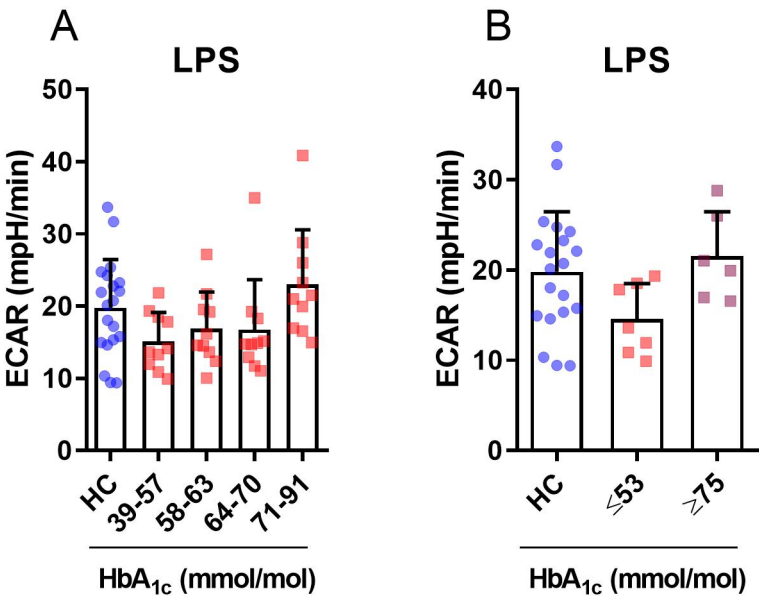

**Supplemental Figure 5.** The association of HbA<sub>1c</sub> levels with monocyte metabolism. Extracellular Flux of monocytes isolated from T1D patients and HCs was measured after injection of LPS. Values of T1D patients are shown grouped into equally sized quartiles based on HbA<sub>1c</sub> levels and compared with values of HC. Values of T1D patients that fall within two groups of extremes are compared to HC values. HbA<sub>1c</sub> quartiles; HC: n = 20, T1D quartiles: n = 10-11, HbA<sub>1c</sub> ≤53 mmol/mol: n = 7, HbA<sub>1c</sub> ≥75 mmol/mol: n = 6. T1D: type 1 diabetes, HC: healthy controls, ECAR: extracellular acidification rate, LPS: lipopolysaccharide.

# Supplemental Figure 6

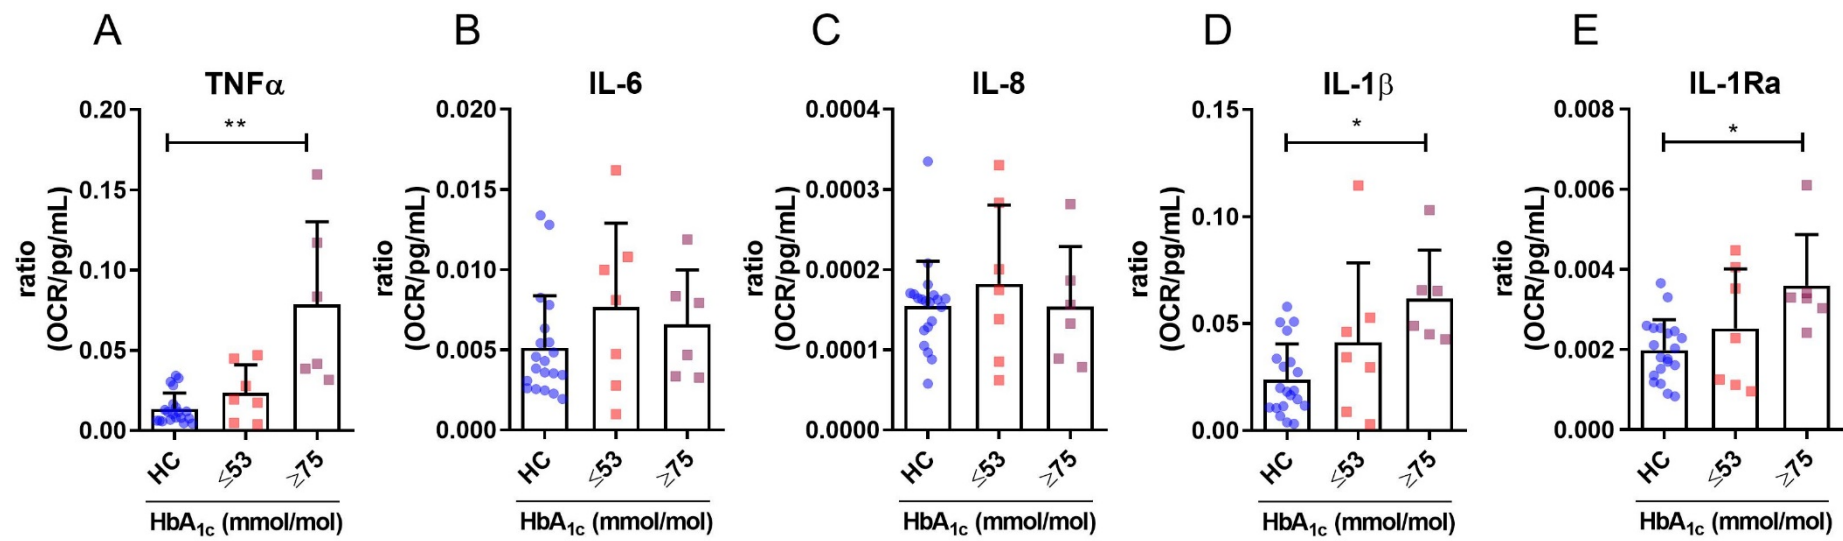

**Supplemental Figure 6.** Oxygen consumption rates (OCR) were measured by extracellular flux in CD14+ cells for 90 consecutive minutes after direct stimulation with P3C. Cytokine secretion was measured after 24 hour stimulation with P3C. The ratio between OCR and cytokine secretion was calculated and is shown for TNFα (A,  $p = 0.0011$ ), IL-6 (B), IL-8 (C), IL-1β (D,  $p = 0.0106$ ), IL-1Ra (E,  $p = 0.0292$ ). HbA<sub>1c</sub> ≤53 mmol/mol:  $n = 7$ , HbA<sub>1c</sub> ≥75 mmol/mol:  $n = 6$ ; \* $p < 0.05$ , \*\* $p < 0.01$ , \*\*\* $p < 0.001$ . T1D: type 1 diabetes patients, HC: healthy controls, OCR: oxygen consumption rate, P3C: Pam3CysK.

# Supplemental Table 1

## Primer Sequences for RT-PCR

| Gene  | Forward primer        | Reverse primer         | Measured efficiency | Measured R <sup>2</sup> |
|-------|-----------------------|------------------------|---------------------|-------------------------|
| B2M   | GATGAGTATGCCTGCCGTGT  | CTGCTTACATGTCTCGATCCCA | 98.8%               | 0.995                   |
| JUN   | AACAGGTGGCACAGCTTAAAC | CAACTGCTGCGTTAGCATGAG  | 91.5%               | 0.998                   |
| CXCL5 | AGCTGCGTTGCGTTTGTTTAC | TGGCGAACACTTGCAGATTAC  | 100.4%              | 0.991                   |
